# Supplementary material for: YTHDF1 rs6090311 A>G polymorphism reduces Hepatoblastoma risk: Evidence from a seven-center case-control study
Source: PubMed Central journal article supplement (PMC7378914; doi:10.7150/jca.46120), 2020-06-28
Supplement: jcav11p5129s1.pdf [file jcav11p5129s1.pdf]

**Table S1.** Frequency distribution of selected variables in hepatoblastoma patients and cancer-free controls

| Variables        | Cases (N=313) |       | Controls (N=1446) |       | <i>P</i> <sup>a</sup> |
|------------------|---------------|-------|-------------------|-------|-----------------------|
|                  | No.           | %     | No.               | %     |                       |
| Age range, month | 0.03-149.97   |       | 0.004-156.00      |       | 0.251 <sup>b</sup>    |
| Mean ± SD        | 23.75 ± 25.93 |       | 25.23 ± 19.38     |       |                       |
| <17              | 168           | 53.67 | 642               | 44.40 |                       |
| ≥17              | 145           | 46.33 | 804               | 55.60 | 0.983                 |
| Gender           |               |       |                   |       |                       |
| Female           | 129           | 41.21 | 595               | 41.15 |                       |
| Male             | 184           | 58.79 | 851               | 58.85 |                       |
| Clinical stages  |               |       |                   |       |                       |
| I                | 97            | 30.99 | /                 | /     |                       |
| II               | 63            | 20.13 | /                 | /     |                       |
| III              | 64            | 20.45 | /                 | /     |                       |
| IV               | 27            | 8.63  | /                 | /     |                       |
| NA               | 62            | 19.81 | /                 | /     |                       |

SD, standard deviation, NA, not available.

<sup>a</sup> Two-sided  $\chi^2$  test for distributions between hepatoblastoma cases and cancer-free controls.

<sup>b</sup> T-test for age distribution between hepatoblastoma patients and cancer-free controls.

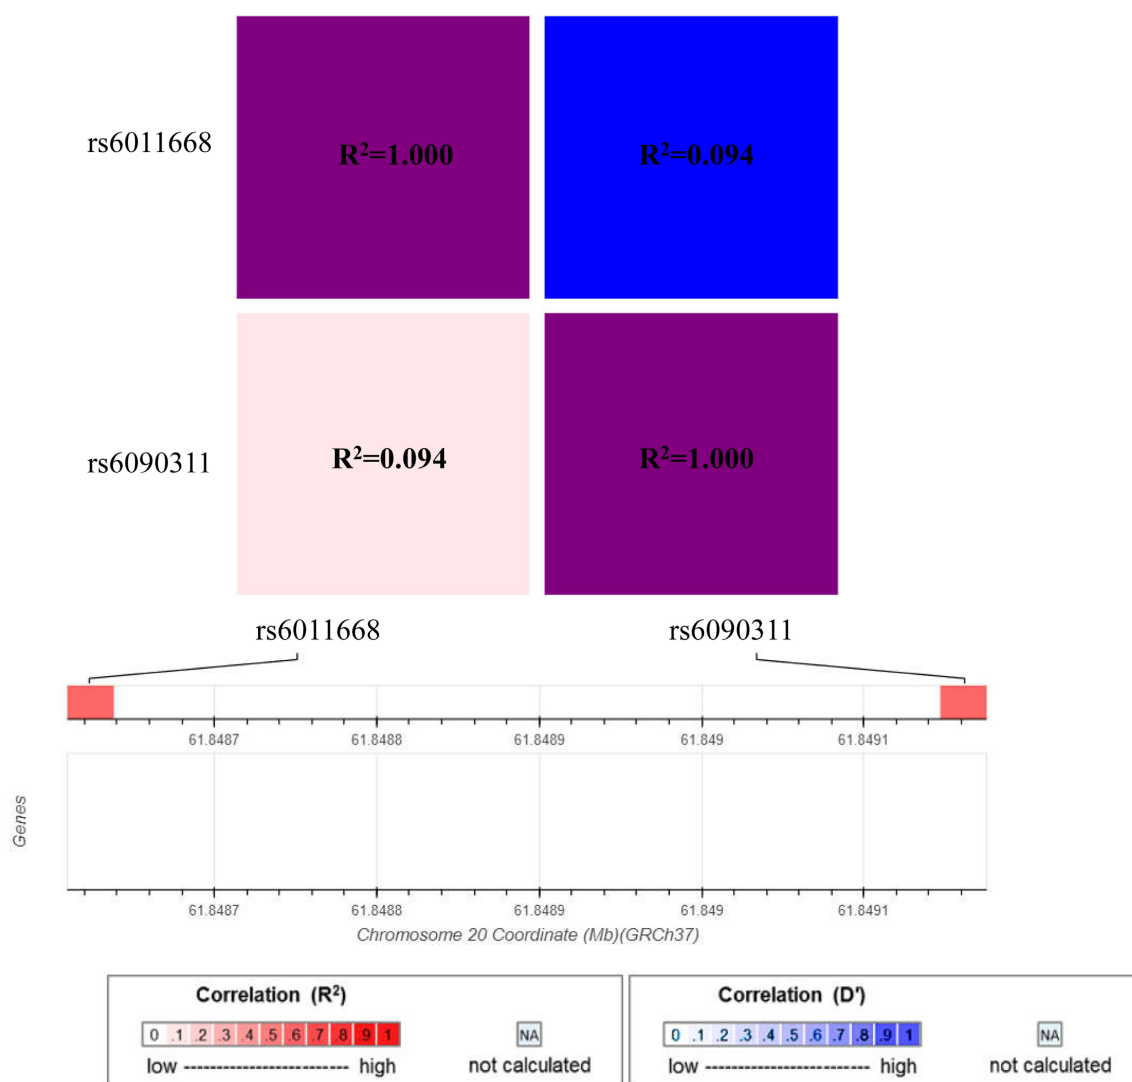

**Figure S1.** Linkage disequilibrium (LD) analysis for the two selected SNPs in Chinese Han population consisting of CHB (Han Chinese in Beijing, China) and CHS (Southern Han Chinese) subjects. LD as  $R^2$  for SNP pairs is shown inside the squares.
